1 **Full title:** The effect of competency-based education in obstetric emergencies on  
2 midwifery students in clinical skill lab, based on Kirkpatrick evaluation model: A  
3 randomized controlled trial

4 **Short title:** the effect of competency-based education in obstetric emergencies and  
5 midwifery students

6 **Authors:** Masumah Hakimi<sup>a</sup>, Masoomeh Kheirkhah<sup>b#</sup>, Jamileh Abolghasemi<sup>c</sup>, Razia Hakimi<sup>a</sup>,  
7 Fatemeh farshad<sup>d</sup>

8 <sup>a</sup> International campus, School of Nursing and Midwifery, Iran University of Medical Sciences,  
9 Tehran, Iran.

10 <sup>b</sup> Nursing Care Research Center (NCRC), School of Nursing and Midwifery, Iran University of  
11 Medical Sciences, Tehran, Iran.

12 <sup>c</sup> Department of Biostatistics, School of Public Health, Iran University of Medical Sciences,  
13 Tehran, Iran.

14 <sup>d</sup> School of Dentistry, Tehran University of Medical Sciences, Tehran, Iran.

15

16 # Correspondence

17 Masoomeh Kheirkhah, PhD, [Kheirkhah.m@iums.ac.ir](mailto:Kheirkhah.m@iums.ac.ir) .

18 Nursing Care Research Center (NCRC), School of Nursing and Midwifery, Iran University of  
19 Medical Sciences, 00982188013887, Tehran, Iran.

20

## 21 **Abstract**

### 22 **Background:**

23 Obstetric emergency is one of the most important causes of maternal and neonatal  
24 mortality, and competency-based education is one of the efficient approaches to cover  
25 this. Objective structured clinical examination is one of the valid methods in measuring  
26 students' competency and performance. Kirkpatrick evaluation model is a great method  
27 to assess a training impact.

28 **Objectives:** This study was designed to determine the effect of competency-based  
29 education on midwifery students based on Kirkpatrick evaluation model.

30 **Design:** Randomized controlled trial

31 **Setting:** Nursing and Midwifery School in Islamic Republic of Iran (Iran University of  
32 Medical Sciences)

33 **Participants:** eighty students in third to fifth term of associate and bachelor's degree in  
34 midwifery (intervention group=40, control group=40)

### 35 **Methods:**

36 Using stratified random sampling, research team trained learners of intervention group  
37 in 4 sessions, 5 hours/day in a month in emergency obstetric cares. Both groups had  
38 been receiving the routine schedule of the faculty. Knowledge, skills, and self-  
39 confidence were assessed three times, before, immediately and 6 weeks after training  
40 by researcher made questionnaire, Objective Structured Clinical Examination (OSCE)  
41 and self-reported questionnaire respectively. Data were analyzed with descriptive,  
42 inferential statistics.

### 43 **Results:**

44 The level of knowledge, skills, and self-confidence increased significantly in the  
45 intervention group, in immediate and 6 weeks after intervention ( $P < 0.001$ ). In  
46 intervention group, Mean  $\pm$  S.D of all variables were  $5.05 \pm 2.074$ ,  $143.30 \pm 12.146$  and  
47  $11.65 \pm 2.045$ , which increased to  $10.17 \pm 1.318$ ,  $527.70 \pm 19.995$  and  $18.97 \pm 1.980$  and  
48 remained at the same levels 6 weeks later,  $9.37 \pm 2.215$ ,  $521.80 \pm 19.784$  and  
49  $19.00 \pm 2.631$ ; in the control group, this trend was not significant ( $P = 0.380$ ,  $P = 0.455$  and  
50  $P = 0.191$ ).

51 **Conclusion:** Competency-based education can be used in midwifery education and in-  
52 service training. We need to use new educational approaches such as competency-  
53 based to have a valuable impact on knowledge skills and self-confidence. This may  
54 affect health indexes indirectly.

55 **Keywords:** competency-based education, learning (knowledge and skill), behavior  
56 (self-confidence), clinical skill, midwifery

57

## 58 **Introduction**

59 One of the most important causes of maternal and neonatal mortality is the low quality  
60 of care provided for mothers and babies which is probably as a result of low levels of  
61 skills in health care providers especially in obstetric emergencies. The gap existed  
62 between theory and clinical education, can lead to low quality of health services in  
63 clinical areas (1). In 2015, almost 303000 women died during pregnancy, delivery and  
64 after birth; 830 mothers lose their lives every day because of preventable complications  
65 related to birth and 99 percent of them occurred in developing countries (2, 3). In 2017,  
66 the maternal mortality rate (MMR) in Iran and Afghanistan were 23.3 and 299.1 per  
67 100000 live births, respectively (4).

68 One of the most important instructions to constraint maternal and neonatal death is  
69 promoting the quality of obstetric care (5). In order to achieve this goal, midwives and  
70 gynecologists are being trained. Education using conventional approaches, do not have  
71 the required durability; it illustrates the need for using modern teaching methods in the  
72 education of midwifery skills (6, 7). The Competency-based educational approach is  
73 one of the active and learner-centered methods which increases the ability to perform  
74 skills by practicing and repeating (7, 8). Competency in emergency obstetric care is one  
75 of the main professional abilities which the International Confederation of Midwives  
76 (ICM) emphasizes on it. Shoulder dystocia, bimanual compression of the uterus,  
77 manual removal of placenta, postpartum hemorrhage (PPH) management and neonatal  
78 resuscitation are some of the common emergencies that achieving competency before  
79 confronting them by midwives, can prevent maternal and neonatal mortality and  
80 morbidity all over the world (9). Obstetric emergencies teaching in a clinical skill lab can  
81 help students to achieve professional competency before clinical environments (10).  
82 Learners 'training by using manikins in a quiet environment before entering the hospital,  
83 can decline stress and enhance self-confidence and self-efficacy (11-13). This topic is  
84 so important, as more than 65 percent of studies and interventions with the aim of  
85 decreasing maternal and neonatal mortality, have been carried out in clinical skill lab or  
86 clinical centers (14, 15). WHO and ICM have identified the minimum qualifications,  
87 required for midwifery graduates. Competency-based education approach can help to  
88 access skill in clinical performance and professional behavior.

89 To evaluate the effectiveness of this kind of programs, Kirkpatrick evaluation model  
90 which assesses the course effect in learners in four levels (Reaction, Learning,  
91 Behavior, and impact) can be used. In various studies, different levels of Kirkpatrick

92 evaluation model have been used (16). Since the evaluation of knowledge, skills, and  
93 self-confidence in the medical field, especially in midwifery, have a direct relationship  
94 with mother and baby lives, therefore it is very important to pay attention to it. This study  
95 was conducted to determine the effect of competency-based training in obstetric  
96 emergencies on midwifery students in the clinical skill lab based on the Kirkpatrick  
97 evaluation model.

## 98 **Materials and Methods**

### 99 **Trial design**

100 This study is a randomized controlled trial with a control group which investigated the  
101 effect of competency-based education in obstetric emergencies in midwifery  
102 undergraduate students. Using stratified random sampling, learners were divided into  
103 two groups by researcher. To control information bias, the evaluation of control group  
104 were completed before intervention started. Both groups received regular midwifery  
105 emergency obstetric care topics by the faculty members in accordance with the  
106 approved syllabus of this country ministry of ministry of health and medical education.

### 107 **Participants and setting**

108 All midwifery students in semester 3 to 5, associate and bachelor 'degrees in nursing  
109 and midwifery faculty, informed by posters or directly by the researcher. These students  
110 who do not have especial experience in practical skills except internship were eligible to  
111 participate. Not participating even in one session was the criterion for exclusion.

### 112 **Sample size:**

113 To determine the sample size for each objectives, the sample size separately was  
114 calculated using the following formula; in which the confidence level (1- $\alpha$ ), 95 percent,  
115 the test power (1- $\beta$ ), 80 percent, standard deviation ( $\sigma$ ) 12.1 and accuracy, 0.5 were  
116 considered (17); so the sample size in each group was 40 people.

$$117 \quad n = \frac{(z_{1-\alpha/2} + z_{1-\beta})^2 \delta^2}{d^2} = \frac{(1.96 + 0.84)^2 (1.12)^2}{(0.5)^2} \approx 40$$

$$118 \quad z_{1-\frac{\alpha}{2}} = z_{0.975} = 1.96$$

$$119 \quad z_{1-\beta} = z_{0.8} = 0.84$$

$$120 \quad d = 0.5$$

### 121 **Intervention**

122 This study was done in accordance to the ethics guideline of Iran University of Medical  
123 Sciences (IR.IUMS.REC1397.026) and registered in Iranian Registry of Clinical Trials  
124 (IRCT20180609040017N1). All students signed the informed consent. 86 students  
125 registered and they were assigned into two groups, intervention (n=43) and control  
126 (n=43). First, the objectives and methods of research were explained to learners. All  
127 learners completed demographic, knowledge and self-confidence questionnaires. Then,  
128 they participated in an OSCE in clinical skill lab based on checklists. The course  
129 content was prepared using textbooks and “Emergency Obstetric Care Course  
130 Package” of California University. The topics included diagnosis and management of  
131 dystocia, postpartum hemorrhage, newborn resuscitation and shock which were taught  
132 in the classroom and skill lab center. The validity and reliability of all questionnaire and  
133 checklists was verified by 11 midwifery experts and faculty members; the CVI index  
134 was generally 0.95 (0.91 - 0.97) and the correlation coefficient using “test-retest”  
135 method in the knowledge dimension 0.91, in skill 0.79 and in self-confidence 0.89. Also,  
136 the assessors were trained by the researcher and the Kappa coefficient of assessors  
137 was calculated at each station which was more than 0.7 in various stations.

138 The research team conducted the training in 4 sessions which every session duration  
139 was 5 hours, once a week, and the assessment was carried out before, immediately  
140 and 6 weeks after the end of the intervention. The selected educational approach was  
141 competency-based. Firstly, the training began with theoretical topics with different  
142 teaching methods such as lectures, watching videos and PowerPoint presentations. The  
143 course content in every session was as follows:

144 Session 1, the reasons for using partograph, filling and interpreting partograph;  
145 episiotomy procedure, and its repair, practicing the skill of episiotomy and its repair;  
146 Session 2, causes, diagnosis and management of dystopia and its variants, practicing  
147 the skill of shoulder dystocia, Session 3, causes, diagnosis and management of  
148 newborn resuscitation and shock management in adults; practicing the skill of neonatal  
149 resuscitation and shock management, Session 4, causes, symptoms, diagnosis and  
150 management of postpartum hemorrhage; practicing the skill of manual removal of  
151 placenta and uterine bimanual massage.

152 In every session, after the theory session, skills were simulated on a model in the  
153 clinical skill lab by the researcher. The following checklists were used: episiotomy and  
154 its repair, shoulder dystocia, newborn resuscitation, uterine bimanual compression,  
155 manual removal of placenta and shock management. Then the learners started group  
156 discussion and practicing the skills with supervision. The researcher provided  
157 appropriate feedback during practice, and it was continued until competency gained by  
158 every learner.

159 Knowledge assessment was done by a questionnaire consists of 12 multiple choice  
160 questions. Every correct answer had one score and the overall score was 12. Self-  
161 confidence questionnaire was measured by Likert range of three options from score 1

162 for “no self-confidence” to 3 for “fully self-confident”. Skills assessed by OSCE in 7  
163 stations. The stations included: Using partograph, episiotomy and its repair, shoulder  
164 dystocia, neonatal resuscitation, uterine bimanual compression, manual removal of  
165 placenta, and shock management. The assessments were conducted by trained  
166 assessors using checklists. Each step was scored by Likert ‘range of 5 options, from  
167 score 1 “completely unsatisfactory” to 5 “completely satisfactory”. The total score in  
168 each checklist varied based on the number of steps. Cut-off point in knowledge  
169 dimension was 80 percent and in skill dimension was 90 percent (18).

## 170 **Analysis:**

171 Data were analyzed by SPSS version 16. Descriptive statistics such as tables of  
172 frequency, numerical indexes and inferential statistics such as Chi-square, Independent  
173 t-test, and repeated measures analysis of variance were used to describe the results.  
174 The level of significance was considered  $P < 0.05$ .

## 175 **Results**

### 176 **Characteristics of participants**

177 From 86 participants, (43 students in control and 43 in intervention group), 6 participants  
178 excluded from the study; in the control group, 3 students due to illness and unwillingness  
179 to continue the study, and in the intervention group, one student due to overlapping the  
180 course with her training in hospital and 2 students due to unwillingness to be evaluated  
181 had not continued the course and its evaluation. In conclusion, data analysis was carried  
182 out on 80 students, 40 participants in each group (table 1: consort diagram).

183

184  
185  
186

Table 1: Consort diagram

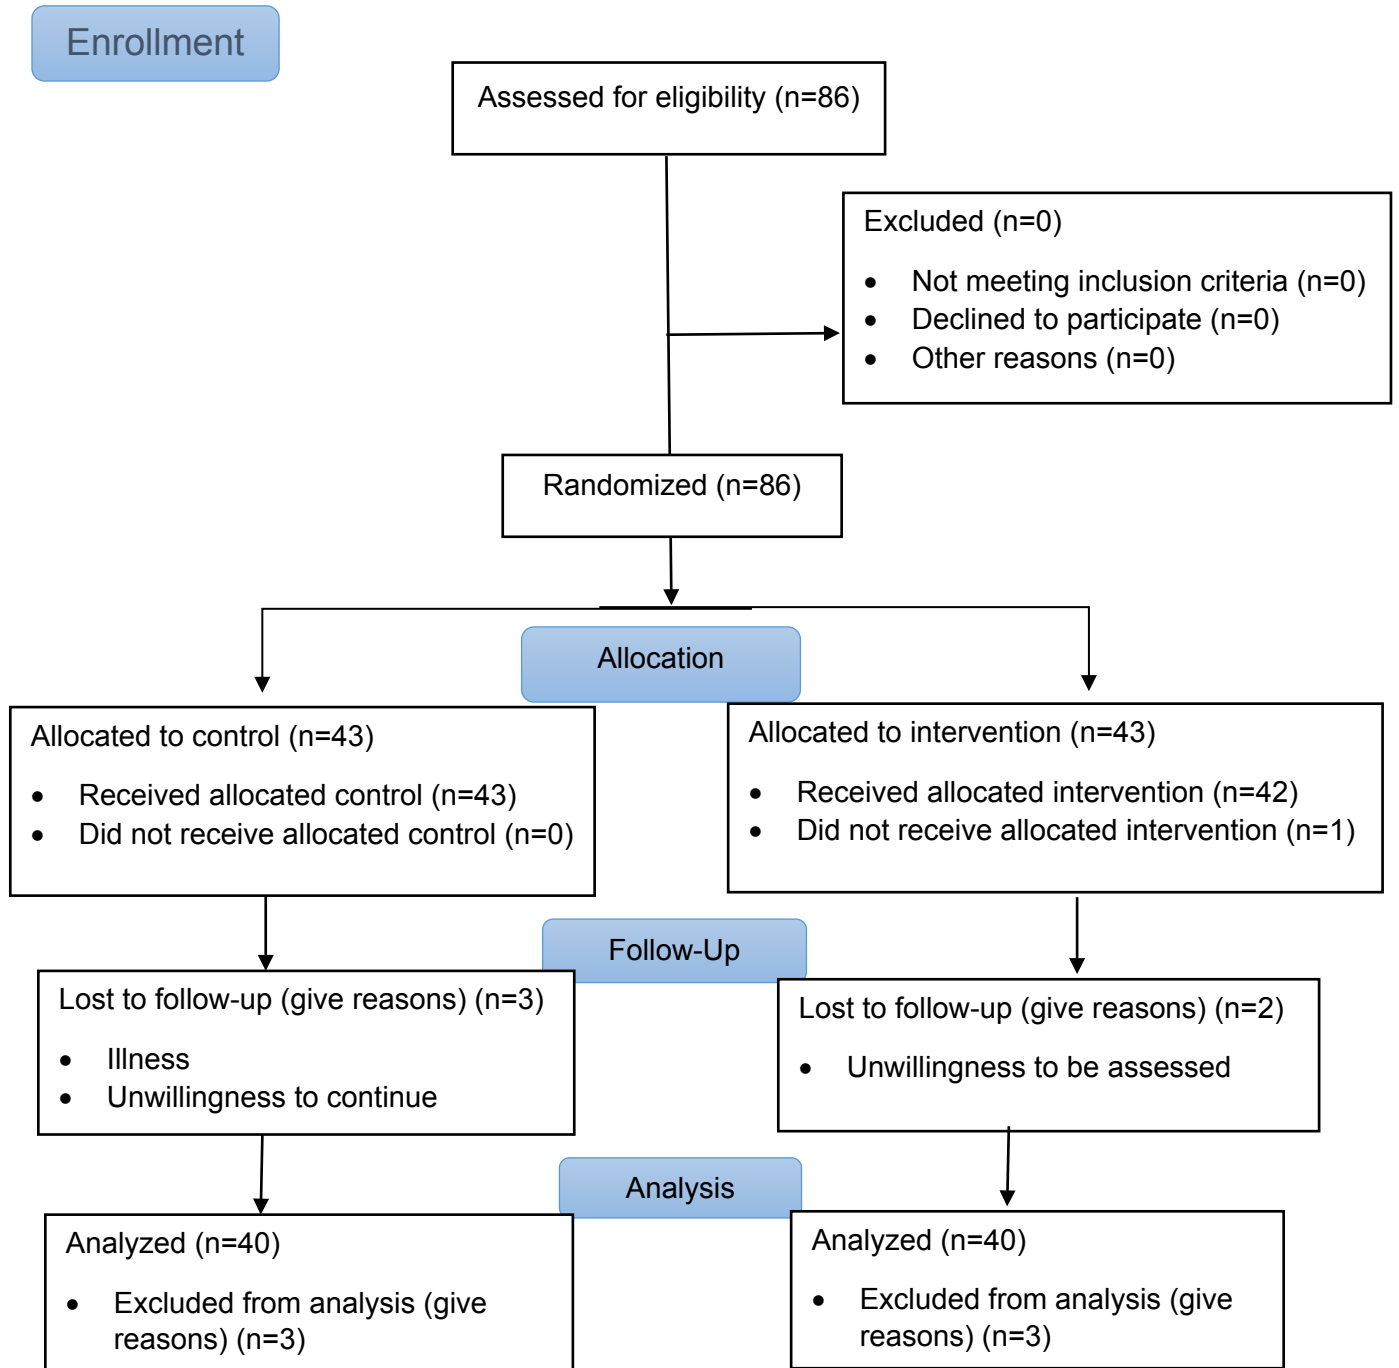

187 Both groups did not have a significant difference in age, residential place, last term  
 188 average, number of deliveries with coach supervision and independent attendance,  
 189 experience in dystocia, newborn resuscitation, postpartum hemorrhage and shock  
 190 management. The majority of students (33.75%) were living in the governmental hostel.  
 191 Mean and standard deviation of the learner's age was  $21.94 \pm 0.475$ , the last term  
 192 average was  $16.55 \pm 0.109$ . Learners' demographic features and previous experience in  
 193 obstetric emergency skills are reported in Table 2.

194 **Table 2: Demographic and previous experience in obstetric emergencies workshops in participants**

| variables                                    | Intervention     | Control          | Statistics      |
|----------------------------------------------|------------------|------------------|-----------------|
| <b>Age Average <math>\pm</math> SD</b>       | 21.60 $\pm$ 2.38 | 22.27 $\pm$ 3.00 | t=1.11; p=0.269 |
| <b>Last term Average <math>\pm</math> SD</b> | 16.64 $\pm$ 0.97 | 16.47 $\pm$ 0.98 | t=0.73; p=0.442 |
| <b>Residential Place</b>                     |                  |                  |                 |
| <b>Governmental dorm</b>                     | 16               | 11               | df=2            |
| <b>Non-governmental dorm</b>                 | 11               | 14               | $\chi^2=2.735$  |
| <b>Living with parents</b>                   | 13               | 15               | p=0.434         |
| <b>Experience in normal delivery</b>         |                  |                  |                 |
| <b>Yes</b>                                   | 29               | 32               | df=1            |
| <b>No</b>                                    | 11               | 8                | $\chi^2=0.620$  |
|                                              |                  |                  | p=0.430         |
| <b>Experience in Neonatal Resuscitation</b>  |                  |                  |                 |
| <b>Yes</b>                                   | 1                | 2                | p=1.00          |
| <b>No</b>                                    | 39               | 38               |                 |
| <b>Experience in PPH Management</b>          |                  |                  |                 |
| <b>Yes</b>                                   | 4                | 5                | p=1.00          |
| <b>No</b>                                    | 36               | 35               |                 |

195 **Main outcomes**

196 Knowledge, skills and self-confidence of intervention group increased significantly in  
 197 immediately and 6 weeks after intervention compared to the control group (Table 3). In  
 198 comparison between groups, based on repeated measures of variance test, Before the  
 199 intervention, There were no significant differences in the level of knowledge, skill, and  
 200 self-confidence among students between groups (respectively P = 0.673, P = 0.153, and



201 P =0.156). The scores of knowledge, skill and self-confidence in all dimensions between  
 202 groups had a significant difference (P<0.001).

203 **Table 3: The effects of intervention on participants**

| Variables                  | Evaluation Time   | Groups (Mean ± SD) |               | Confidence Interval |             | p-value <sup>1</sup> |
|----------------------------|-------------------|--------------------|---------------|---------------------|-------------|----------------------|
|                            |                   | Intervention       | Control       | Lower bound         | Upper bound |                      |
| <b>Knowledge</b>           | Before            | 5.05 ± 2.07        | 4.87 ± 1.58   | 4.29                | 5.63        | 0.673                |
|                            | Immediately after | 10.17 ± 1.31       | 5.20 ± 1.55   | 4.74                | 10.62       | <0.001               |
|                            | 6 weeks after     | 9.37 ± 2.21        | 5.32 ± 1.50   | 4.72                | 9.97        | <0.001               |
| <b>p-value<sup>2</sup></b> | <0.001            |                    |               |                     |             |                      |
| <b>Skill</b>               | Before            | 118.47 ± 10.14     | 116.22 ± 8.32 | 113.30              | 121.39      | 0.282                |
|                            | Immediately after | 416.92 ± 19.76     | 116.47 ± 7.07 | 111.80              | 421.59      | <0.001               |
|                            | 6 weeks after     | 415.07 ± 17.28     | 117.90 ± 9.12 | 113.54              | 419.42      | <0.001               |
| <b>p-value</b>             | <0.001            |                    |               |                     |             |                      |
| <b>Self-confidence</b>     | Before            | 10.52 ± 1.88       | 11.17 ± 1.78  | 9.94                | 11.75       | 0.117                |
|                            | Immediately after | 16.70 ± 1.75       | 10.75 ± 1.42  | 10.24               | 17.20       | <0.001               |
|                            | 6 weeks after     | 16.75 ± 2.30       | 10.35 ± 2.10  | 9.65                | 17.44       | <0.001               |
| <b>p-value</b>             | <0.001            |                    |               |                     |             |                      |

204 <sup>1</sup> Independent t test

205 <sup>2</sup> Repeated Measures Analysis

206 In comparison between groups, the score of knowledge, skill and self-confidence in all  
 207 dimensions, increased significantly in immediately and 6 weeks after intervention  
 208 (P<0.001). To compare the scores within groups, knowledge, skills, and self-confidence  
 209 increased significantly from before to immediately, and 6 weeks after intervention, in  
 210 intervention group (P<0.001); by Bonferroni Post-hoc tests in all dimensions, there was a  
 211 significant difference between before and immediately and 6 weeks after intervention  
 212 (P<0.001). There was no significant difference between scores of immediate and 6 weeks  
 213 after intervention in all mentioned areas, which means that knowledge, skill, and self-  
 214 confidence were consistent 6 weeks after intervention (respectively P = 0.167, P = 0.464,  
 215 P = 1.00). Chart 1-3 illustrates the changes and comparisons of knowledge, skill, and self-  
 216 confidence in intervention and control.

217 S1-3. Chart 1-3

## 218 **Discussion**

219 One of the effective factors in high maternal mortality is the gap of skill performance  
220 between theoretical knowledge and clinical activities in “real world”. Based on research  
221 team experience, In Iran, despite the appropriate theory teaching which is based on the  
222 latest scientific references, midwifery students in a clinical environment do not have the  
223 opportunity to achieve experience in obstetric emergency management. University  
224 professors train their students in clinical skill lab limitedly and the major part of clinical  
225 education is performed in bedside in hospitals. However, they were not allowed to  
226 participate in high-risk pregnancy care and management; this can result in  
227 dissatisfaction in competency and self –confidence.

228 Competency-based education is one way to diminish this gap. Also, it is needed to  
229 choose an acceptable and efficient method to teach and evaluate skills, first in clinical  
230 skill lab, then in the hospital such as simulation and Objective Structured Clinical  
231 Examination (OSCE). The ultimate goal of many studies is to upgrade the level of health  
232 index in the country in line with Sustainable Development Goals. By using an  
233 appropriate design of evaluation like Kirkpatrick Evaluation Model, it is possible to  
234 understand the impact of the study on higher levels.

235 This study was conducted with the aim to determine the effect of Competency-based  
236 education of obstetric emergencies on knowledge, skills, and self-confidence of  
237 midwifery students with OSCE and using Kirkpatrick evaluation model in its second  
238 (knowledge, skills) and third levels (self-confidence). Based on our findings, this study is  
239 the first research in the context of educational evaluation with OSCE in obstetric  
240 emergencies with a competency-based educational approach in the clinical skill center  
241 by using kirckpatric model of evaluation in Iran. All previous studies in these trainings  
242 had been done as in-service courses, but our research conducted on students. As half  
243 of the students participated in this study were international trainees and they were  
244 supposed to return to their country (Afghanistan), it was needed to use a special  
245 method which can enhance health indexes such as MMR.

246 In addition, one of the most precious evaluation method in clinical skills is OSCE  
247 that we used in this study. OSCE can generate a beautiful relationship between  
248 teaching and assessment. This high valid method can investigate a broad spectrum of  
249 clinical skills and individual abilities. Despite the fact that the best place for applying  
250 newly taught skills is “real world” and “real patient”, one of the best methods of teaching,  
251 practicing and evaluation in some rare urgent activities such as obstetric emergencies,  
252 needed to be fulfilled before graduation, is OSCE in clinical skill center (19, 20). The  
253 study by Collado-Yurrita at Madrid University approved that utilizing this approach has  
254 progressively developed in recent years (21). OSCE investigates the created changes  
255 in each individual, but it is clear that it is not enough. The main goal for training is not

256 individual changes, promotion in organization performance is the ultimate goal; one of  
257 the foremost methods is Kirkpatrick which assesses the effect of our intervention on  
258 different levels of stakeholders such as the impact on the organization, government or  
259 country.

260 Data analysis revealed that knowledge, skill, and self-confidence increased significantly  
261 in immediate and 6 weeks assessments after the intervention. The study by Ameh et al.  
262 (2018) in which, knowledge and skill retention after emergency obstetric care training  
263 with “skills and drills” approach, was investigated, their result was the same as ours;  
264 knowledge and skill levels increased significantly immediately and three months after  
265 training ( $P < 0.01$ ). The improvement in skill scores was much higher than knowledge  
266 and previous job experience more than 13 years caused lower retention and more drop  
267 in scores, especially in skill assessment (22). This reduction seems to be due to more  
268 skill retention with passing time and increasing experience. This is one of the reasons to  
269 start this course during university days, not after graduation or in-service.

270 This approach leads to competency achievement for all students after the intervention  
271 and retention six weeks later in the intervention group and no competency in the control  
272 group. In our study cut-off point in knowledge was 80% and in skill 90%. Mirkuzie et al.  
273 (2014) studied the reaction and knowledge of health care providers in Ethiopia. 70% of  
274 the learners achieved competency in the first assessment after the intervention, and  
275 scores remained up until 6 months after training (23). It seems that the course planning  
276 after completion of the theory session at university or before starting the internship can  
277 have the best impact in results.

278  
279 The coincidence between teaching and learning education of clinical skills in skill lab by  
280 practicing them with a simulation-based approach can improve retention of knowledge  
281 and skill as well as self-confidence of students in performing clinical skills. Walker et al.  
282 study (2015) was conducted with a simulation approach and group practices, an  
283 increase and retention of knowledge in a self-report evaluation were observed (24).

284 Their results were in the same line with our study. The results of Walker et al. (2013),  
285 showed growth in scores of knowledge and confidence, immediately after intervention;  
286 but significant fall within 6 weeks after training (6). Also, the study by Tang et al. (2015)  
287 aimed to improve obstetric emergencies ‘knowledge and skills in Malawi also led to an  
288 increase in knowledge and skill after intervention ( $P < 0.001$ ), but 6 months after training,  
289 both variables decreased significantly (25). It showed that despite the fact that,  
290 traditional approaches have this capacity to enhance knowledge and skill levels  
291 immediately, but they were not effective knowledge and skill retention. In addition,  
292 based on Miller Pyramid, “Know” about a special topic is not enough, and without  
293 “Show” and “perform” and practicing skills, we encounter more decay and lower  
294 retention. Tang and Walker study results showed that we need to use new educational

295 approaches such as competency-based to have a valuable impact and retention of  
296 knowledge and skills and self-confidence.

297

298 Our results revealed that using this way of teaching and evaluation can enhance  
299 learner's self-confidence. Increasing self-confidence leads to self-efficacy and as a  
300 result, midwives ability in performing skills can grow. Walker et al. study in Mexico  
301 resulted in simulation training enhanced self-efficacy followed by better management in  
302 emergencies (26, 27). Self-efficacy and self-confidence, especially in emergency case  
303 management, are key factors to show competency(8). Studies found that professionals  
304 who have more self-confidence and self-efficacy can manage emergency situations  
305 better (17, 26).

306 The results of Glasgow et al. study revealed that a competency-based approach  
307 can improve the transparency, efficiency, impact, and quality of education, as well as  
308 increasing the accountability of learners and educators (28). KC et al. (2017) also aimed  
309 to assess the retention of newborn resuscitation skills after training with Time-series  
310 design. In that study, the knowledge and skill scores increased significantly in the  
311 immediate evaluation and remained stable until six months after intervention (29). In  
312 addition, Urbute et al. (2017) investigated the changes in learners knowledge and self-  
313 esteem in obstetric emergencies, with self-assessment and Likert scale (30). Although  
314 the results were the same as ours, self-assessment with Likert scale is not an  
315 appropriate method to evaluate knowledge and it was one of the items which we pay  
316 attention to.

317 Results of Repeated Measures ANOVA illustrated that knowledge, skills and self-  
318 confidence, immediately and 6 weeks after training increased significantly. The  
319 Competency-based could enhance the learning outcomes through practice and  
320 repetition, especially in medical sciences (21). The results of Ameh et al. (2012) study  
321 with Kirkpatrick evaluation method revealed knowledge, and skills increased at the  
322 second level and self-confidence at the third level among learners (17). Also, the study  
323 by Grace et al in Cameron (2015) was similar to our study. The results showed that  
324 knowledge, skills, and self-confidence of learners immediately increased significantly  
325 after the intervention. The persistence of knowledge and skills a six-month after the  
326 intervention has led to a high level of self-confidence in managing midwifery emergency  
327 situations. The theoretical framework of this research was based on Bloom's theory of  
328 education, which divides the educational objectives into cognitive and psychomotor  
329 areas; this suggests that using educational approaches which are more likely to sustain  
330 the competencies after the intervention, can probably improve the level of self-  
331 confidence in managing specific skills. In fact, there is a two-way relationship between  
332 these three components, competence, self-confidence, and stress, and all of them are  
333 being affected by each other (31). Research by Frank et al. (2009) with 68 interns of  
334 obstetrics and gynecology ward, in terms of knowledge and skills, increase immediately

335 after intervention, was in the same line with our study. The results of that study showed  
336 that training in a topic like obstetric emergencies using lectures, simulation approach,  
337 and instructions of how to use mannequins and pre-prepared scenarios as case study  
338 questions, could be effective in increasing knowledge and skills (32). Research by  
339 Walker et al. (2014) in Mexico, was in accordance with the present study. The results  
340 showed that evidence-based knowledge in the management of obstetric emergencies  
341 could be increased with an inter-professional and simulation-based approach,  
342 immediately and 3 months after training, followed by self-efficacy. Some evidence  
343 suggested that self-efficacy improved as a result of increased self-confidence to  
344 diagnose and manage obstetric emergencies (33).

345 Considering that in-service training has significant costs for the hospital and the  
346 government (34), the implementation of this program during university enrollment, after  
347 the completion of training and before the start of the internship, could result in a  
348 significant reduction in costs. By inserting this course in the midwifery curriculum, and  
349 it's implementation as a part of the midwifery program in the country, as well as  
350 conducting in-service training by short-term retraining programs, our peers 'information  
351 can be updated. This intervention was designed to improve the knowledge, skills, and  
352 self-confidence of midwifery students in the field of obstetric emergencies. It is  
353 recommended that these workshops would be held in codified and approved form in the  
354 country.

## 355 **Limitations**

356 This study was the results of MSc midwifery thesis and due to lack of time, we could not  
357 assess the impact of our study in hospitals. It is recommended that the next study would  
358 be conducted in this area.

359

## 360 **Acknowledgments:**

361 This article is the result of the master's thesis of midwifery education at the Faculty of  
362 Nursing and Midwifery, Iran University of Medical Sciences with the financial support of  
363 the UNFPA Office. The authors wish to thank these organizations, the Italian Embassy,  
364 all midwifery students participating in the project, the Center of Clinical Skills in Iran  
365 Nursing and Midwifery Faculty, Vice-chancellor for International Affairs and Research of  
366 Iran University of Medical Sciences.

367

## 369 **References:**

- 370 1. Filby A, McConville F, Portela A. What Prevents Quality Midwifery Care? A Systematic Mapping  
371 of Barriers in Low and Middle Income Countries from the Provider Perspective. PLOS ONE.  
372 2016;11(5):e0153391. pmid: 27135248
- 373 2. WHO. Maternal Mortality. Key Facts [Internet]. Geneva, Switzerland: WHO. 2018 [cited 2019].  
374 Available from: <https://www.who.int/news-room/fact-sheets/detail/maternal-mortality>.
- 375 3. WHO. Global Health Observatory (GHO) Data. Maternal Mortality Country Profiles [Internet].  
376 Geneva, Switzerland: WHO. 2019 [cited 2019]. Available from:  
377 [https://www.who.int/gho/maternal\\_health/countries/irn.pdf?ua=1](https://www.who.int/gho/maternal_health/countries/irn.pdf?ua=1).
- 378 4. Institute for Health Metrics and Evaluation. Health-related SDGs. Maternal Mortality Ratio  
379 [Internet]. University of Washington. 2017 [cited 2019]. Available from:  
380 <https://vizhub.healthdata.org/sdg/>.
- 381 5. WHO. Strengthening Quality Midwifery Education. Geneva, Switzerland: WHO, 2017. 2019.  
382 Report No.
- 383 6. Walker LJ, Fetherston CM, McMurray A. Perceived changes in the knowledge and confidence of  
384 doctors and midwives to manage obstetric emergencies following completion of an Advanced Life  
385 Support in Obstetrics course in Australia. The Australian & New Zealand journal of obstetrics &  
386 gynaecology. 2013;53(6):525-31. pmid: 23829429
- 387 7. Jhpiego CUMSoPHsAMDaDPAA. Emergency Obstetric Care. Trainer Guide. Newyork. London:  
388 Green Communication; 2008. p. 209.
- 389 8. Fullerton JT, Thompson JB, Johnson P. Competency-based education: The essential basis of pre-  
390 service education for the professional midwifery workforce. Midwifery. 2013;29(10):1129-36. pmid:  
391 23906879
- 392 9. International Confederation of Midwives. ICM Essential Competencies for Basic Midwifery  
393 Practice [Internet]. Task Forces - Global Standards. 2013 [cited 2018]. Available from:  
394 <https://www.nvkvv.be/file?file=326878>.
- 395 10. Guguloth K, Sivaranjani BSV. A Retrospective Study of Material & Perinatal Outcome in  
396 Obstetrical Emergencies at Government General Hospital, Guntur. IOSR Journal of Dental and Medical  
397 Sciences (IOSR-JDMS). 2016;15(12):26-31. doi: 10.9790/0853-1512112631
- 398 11. Hassanzadeh S, Amini A, Shagagie A, Hassanzadeh P. Studying the effects of practical procedures  
399 education in clinical skill center on medical students. Iranian Journal of Medical Education. 2002;2(0):26-  
400 7. available from: URL: <http://ijme.mui.ac.ir/article-1-496-en.html>
- 401 12. Sharemi H, Asgari f. A training course on basic gynecological clinical skills and its effect on  
402 medical student's performance in Guilan University of Medical Sciences. Iranian Journal of Medical  
403 Education. 2011;11(2):111-9. available from: URL: <http://ijme.mui.ac.ir/article-1-1007-en.html>
- 404 13. Jafari f, Hakimian Mr, Saburi M. What is the Clinical Skills Learning Center (CSLC)? Iranian Journal  
405 of Medical Education. 2001;1(3):21-9. available from: URL: <http://ijme.mui.ac.ir/article-1-37-en.html>
- 406 14. Nyamtema AS, Urassa DP, van Roosmalen J. Maternal health interventions in resource limited  
407 countries: a systematic review of packages, impacts and factors for change. BMC Pregnancy and  
408 Childbirth. 2011;11(1):30. pmid: 21496315
- 409 15. Utz B, Kana T, van den Broek N. Practical aspects of setting up obstetric skills laboratories – A  
410 literature review and proposed model. Midwifery. 2015;31(4):400-8. pmid: 25535017
- 411 16. van Lonkhuijzen L, Dijkman A, van Roosmalen J, Zeeman G, Scherpbier A. A systematic review of  
412 the effectiveness of training in emergency obstetric care in low-resource environments. Bjog.  
413 2010;117(7):777-87. pmid: 20406229

- 414 17. Ameh C, Adegoke A, Hofman J, Ismail FM, Ahmed FM, van den Broek N. The impact of  
415 emergency obstetric care training in Somaliland, Somalia. *International Journal of Gynecology &*  
416 *Obstetrics*. 2012;117(3):283-7. pmid: 22445951
- 417 18. JHPIEGO. Guidelines for assessment of Skilled Providers After Training in Maternal and Newborn  
418 Healthcare. USA: JHPIEGO; 2004. p. 141.
- 419 19. Harden RM, Gleeson FA. Assessment of clinical competence using an objective structured  
420 clinical examination (OSCE). *Med Educ*. 1979;13(1):41-54. pmid: 763183
- 421 20. Smith V, Muldoon K, Biesty L. The Objective Structured Clinical Examination (OSCE) as a strategy  
422 for assessing clinical competence in midwifery education in Ireland: a critical review. *Nurse education in*  
423 *practice*. 2012;12(5):242-7. pmid: 22633118
- 424 21. Collado-Yurrita L, Ciudad-Cabañas M, Cuadrado-Cenzual M. Evolution of medical education in  
425 the Department of Medicine of the Complutense University of Madrid in the last decade. *Medical*  
426 *teacher*. 2018;40(5):449-52.
- 427 22. Ameh CA, White S, Dickinson F, Mdegela M, Madaj B, van den Broek N. Retention of knowledge  
428 and skills after Emergency Obstetric Care training: A multi-country longitudinal study. *PloS one*.  
429 2018;13(10):e0203606. pmid: 30286129
- 430 23. Mirkuzie AH, Sisay MM, Bedane MM. Standard basic emergency obstetric and neonatal care  
431 training in Addis Ababa; trainees reaction and knowledge acquisition. *BMC Med Educ*. 2014;14:201.  
432 pmid: 25248410
- 433 24. Walker DM, Holme F, Zelek ST, Olvera-García M, Montoya-Rodríguez A, Fritz J, et al. A process  
434 evaluation of PRONTO simulation training for obstetric and neonatal emergency response teams in  
435 Guatemala. *BMC Medical Education*. 2015;15(1):117. pmid: 26206373
- 436 25. Tang JH, Kaliti C, Bengtson A, Hayat S, Chimala E, MacLeod R, et al. Improvement and retention  
437 of emergency obstetrics and neonatal care knowledge and skills in a hospital mentorship program in  
438 Lilongwe, Malawi. *International journal of gynaecology and obstetrics: the official organ of the*  
439 *International Federation of Gynaecology and Obstetrics*. 2016;132(2):240-3. pmid: 26658095
- 440 26. Christian A, Krumwiede N. Simulation Enhances Self-Efficacy in the Management of  
441 Preeclampsia and Eclampsia in Obstetrical Staff Nurses. *Clinical Simulation in Nursing*. 2013;9(9):e369-  
442 e77.
- 443 27. Walker DM, Cohen SR, Estrada F, Monterroso ME, Jenny A, Fritz J, et al. PRONTO training for  
444 obstetric and neonatal emergencies in Mexico. *International Journal of Gynecology & Obstetrics*.  
445 2012;116(2):128-33. pmid: 22112786
- 446 28. Glasgow N, Butler J, Gear A, Lyons S, Rubiano D. Using competency-based education to equip  
447 the primary health care workforce to manage chronic disease. 2017.
- 448 29. Kc A, Wrammert J, Nelin V, Clark RB, Ewald U, Peterson S, et al. Evaluation of Helping Babies  
449 Breathe Quality Improvement Cycle (HBB-QIC) on retention of neonatal resuscitation skills six months  
450 after training in Nepal. *BMC pediatrics*. 2017;17(1):103. pmid: 28399847
- 451 30. Urbutė A, Paulionytė M, Jonauskaitė D, Machtejevienė E, Nadišauskienė RJ, Dambrauskas Ž, et  
452 al. Perceived changes in knowledge and confidence of doctors and midwives after the completion of the  
453 Standardized Trainings in Obstetrical Emergencies. *Medicina*. 2017;53(6):403-9. pmid: 29482880
- 454 31. Grace NB. Knowledge and skills retention among health providers trained in advanced life  
455 support in obstetrics in Cameroon: Moi University; 2015.
- 456 32. Frank K, Lombaard H, Pattinson RC. Does completion of the Essential Steps in Managing  
457 Obstetric Emergencies (ESMOE) training package result in improved knowledge and skills in managing  
458 obstetric emergencies? *South African Journal of Obstetrics and Gynaecology*. 2009;15(3).
- 459 33. Walker D, Cohen S, Fritz J, Olvera M, Lamadrid-Figueroa H, Cowan JG, et al. Team training in  
460 obstetric and neonatal emergencies using highly realistic simulation in Mexico: impact on process  
461 indicators. *BMC Pregnancy and Childbirth*. 2014;14(1):367. pmid: 25409895

- 462 34. van de Ven J, van Baaren GJ, Fransen AF, van Runnard Heimel PJ, Mol BW, Oei SG. Cost-  
463 effectiveness of simulation-based team training in obstetric emergencies (TOSTI study). *European*  
464 *Journal of Obstetrics & Gynecology and Reproductive Biology*. 2017;216:130-7. pmid: 28763738  
465
